# Supplementary material
Source: PubMed Central journal article supplement (PMC3896629)
Supplement: 12263_2013_362_MOESM1_ESM.pdf [file 12263_2013_362_MOESM1_ESM.pdf]

*Genes and Nutrition*

*Electronic Supplementary Material: Online resource 1*

***ELOVL2* gene polymorphisms are associated with increases in plasma eicosapentaenoic and docosahexaenoic acid proportions after fish oil supplement**

Aseel AlSaleh, Zoitsa Maniou, Fiona J Lewis, Wendy L Hall, Thomas A B Sanders and Sandra D O'Dell, on behalf of the MARINA study team.

Corresponding author:

Dr Sandra O'Dell

King's College London, School of Medicine, Diabetes and Nutritional Sciences Division, Franklin-Wilkins Building, 150 Stamford Street, London SE1 9NH, UK.

Email: [sandra.o'dell@kcl.ac.uk](mailto:sandra.o'dell@kcl.ac.uk).

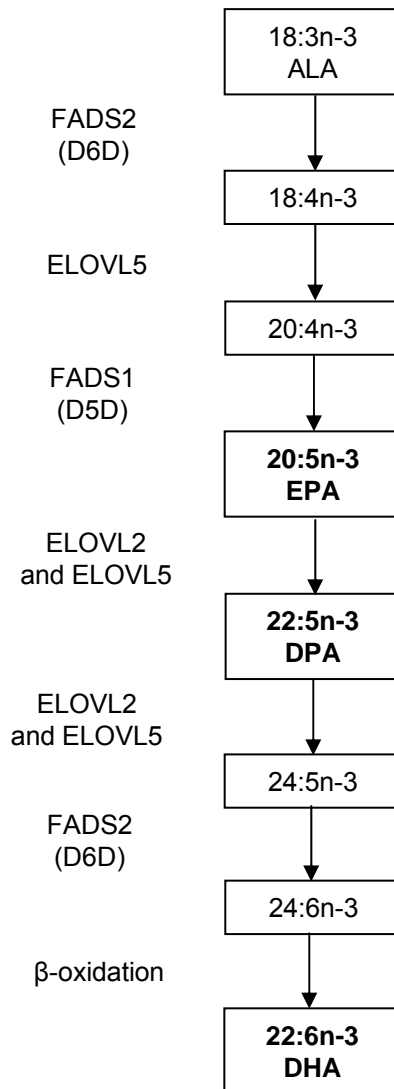

**Online resource 1** Pathway for synthesis of n-3 LC-PUFA from ALA

The synthesis of n-3 LC-PUFA from ALA proceeds by alternating actions of elongases and desaturases. LC-PUFAs investigated in this study are shown in bold. *ALA*, α-linolenic acid; *D5D*, Delta-5 desaturase; *D6D*, Delta-6 desaturase; *DHA*, docosahexaenoic acid; *DPA*, docosapentaenoic acid; *ELOVL*, Elongation-of-very-long-chain-fatty acids; *EPA*, eicosapentaenoic acid; *FADS*, Fatty acid desaturase
