# Supplementary material
Source: PubMed Central journal article supplement (PMC3896629)
Supplement: 12263_2013_362_MOESM2_ESM.pdf [file 12263_2013_362_MOESM2_ESM.pdf]

*Genes and Nutrition*

*Electronic Supplementary Material: Online resource 2*

*ELOVL2* gene polymorphisms are associated with increases in plasma eicosapentaenoic and docosahexaenoic acid proportions after fish oil supplement

Aseel AlSaleh, Zoitsa Maniou, Fiona J Lewis, Wendy L Hall, Thomas A B Sanders and Sandra D O'Dell, on behalf of the MARINA study team.

Corresponding author:

Dr Sandra O'Dell

King's College London, School of Medicine, Diabetes and Nutritional Sciences Division, Franklin-Wilkins Building, 150 Stamford Street, London SE1 9NH, UK.

Email: [sandra.o'dell@kcl.ac.uk](mailto:sandra.o'dell@kcl.ac.uk).

**Online resource 2** *ELOVL2* SNP allele and genotype frequencies

| SNP       | Genotype | Allele and genotype frequencies ( <i>n</i> , %) <sup>a</sup> | <i>P</i> * |
|-----------|----------|--------------------------------------------------------------|------------|
| rs3734398 | MAF      | 0.45                                                         |            |
|           | TT       | 91 (32)                                                      |            |
|           | TC       | 129 (45)                                                     |            |
|           | CC       | 65 (23)                                                      |            |
|           | All      | 285(100)                                                     | 0.14       |
| rs2236212 | MAF      | 0.44                                                         |            |
|           | GG       | 92 (33)                                                      |            |
|           | GC       | 135 (47)                                                     |            |
|           | CC       | 58 (20)                                                      |            |
|           | Total    | 285 (100)                                                    | 0.51       |
| rs953413  | MAF      | 0.48                                                         |            |
|           | GG       | 81 (28)                                                      |            |
|           | GA       | 131 (46)                                                     |            |
|           | AA       | 74 (26)                                                      |            |
|           | Total    | 286 (100)                                                    | 0.16       |

*MAF*, Minor allele frequency.

<sup>a</sup>Frequency of genotypes shown as number of subjects (% total).

\* Hardy-Weinberg equilibrium Chi-sq test (1 *df*). No significant deviation from expected genotype frequencies, *P*-value > 0.05.
