# Supplementary material
Source: PubMed Central journal article supplement (PMC3896629)
Supplement: 12263_2013_362_MOESM3_ESM.pdf [file 12263_2013_362_MOESM3_ESM.pdf]

*ELOVL2* gene polymorphisms are associated with increases in plasma eicosapentaenoic and docosahexaenoic acid proportions after fish oil supplement

Aseel AlSaleh, Zoitsa Maniou, Fiona J Lewis, Wendy L Hall, Thomas A B Sanders and Sandra D O'Dell, on behalf of the MARINA study team.

Corresponding author:

Dr Sandra O'Dell

King's College London, School of Medicine, Diabetes and Nutritional Sciences Division, Franklin-Wilkins Building, 150 Stamford Street, London SE1 9NH, UK.

Email: [sandra.o'dell@kcl.ac.uk](mailto:sandra.o'dell@kcl.ac.uk).

**Online resource 3** Characteristics of 3-locus haplotypes

| Haplotype number        | <i>ELOVL2</i> SNP |           |          | Haplotype frequency % |
|-------------------------|-------------------|-----------|----------|-----------------------|
|                         | rs3734398         | rs2236212 | rs953413 |                       |
| Haplotype 1 (Reference) | 1                 | 1         | 1        | 50.4                  |
| Haplotype 2             | 2                 | 2         | 2        | 45.1                  |
| Haplotype 3             | 1                 | 1         | 2        | 2.7                   |
| Haplotype 4             | 2                 | 1         | 2        | 1.6                   |
| Haplotype 5             | 1                 | 2         | 2        | 0.2                   |

Estimated reconstructed haplotype frequencies under linkage disequilibrium based on 255 subjects with no missing genotype data.

1 = major allele; 2 = minor allele.
